# Supplementary material for: Electromotive Force Generated in All Materials under Temperature Difference
Source: Research Square preprint supplement (doi:10.21203/rs.3.rs-1137728/v1), 2021-12-09
Supplement: Supplementary file 1 [file b8efdb839c9e2ff92af430a3.pdf]

## Nature Advance Online Publication (AOP)

Dear Author,

Your paper may be eligible for our advance online publication (AOP) programme. In this programme, after your paper is typeset and proof corrections returned, the final version will be prepared and will be published online on *Nature's* website at [www.nature.com/nature](http://www.nature.com/nature). It will be published in print as soon afterwards as space is available. The two versions of the paper are identical.

Our offer of this service is conditional on your agreement to the following:

- Your text, figures and any supplementary information are **all** included when you send us the final version of your paper for formal acceptance, and are **all in Nature-preferred format** (within length and below maximum sizes) as specified in our format instructions at: <https://www.nature.com/nature/for-authors/final-submission>.
- The corresponding (or otherwise designated) author undertakes to read and return proof corrections **within 48 hours** of their receipt.
- The corresponding author signs and returns the "licence to publish" form with the final version at formal acceptance.
- **No changes** can be made to the paper once the online version is published.

Please sign and return this letter, preferably scanned and uploaded with the final version of your manuscript. Please specify below the author responsible for returning proofs if different from the corresponding author.

I agree to the above terms and conditions for AOP publication of my paper in *Nature*:

Name: **Dong-il Song**

Manuscript number:
